# Supplementary material
Source: publisher figshare collection journal article supplement (https://acs.figshare.com/ndownloader/files/6504018)
Supplement: Supplementary file 1 [file 6504018]

# **Isolation of Acacetin from *Calea urticifolia* with Inhibitory Properties against Human Monoamine Oxidase-A and -B**

Narayan D. Chaurasiya,<sup>†,#</sup> Vedanjali Gogineni,<sup>‡,#</sup> Khaled M. Elokely,<sup>§,⊥</sup> Francisco León,<sup>‡</sup> Marvin J. Nuñez,<sup>||</sup> Michael L. Klein,<sup>§</sup> Larry A. Walker,<sup>†‡</sup> Stephen J. Cutler,<sup>‡</sup> and Babu L. Tekwani<sup>\*,†,‡</sup>

<sup>†</sup>National Center for Natural Products Research and <sup>‡</sup>Department of BioMolecular Sciences, School of Pharmacy, The University of Mississippi, University, MS 38677, United State

<sup>§</sup>Institute for Computational Molecular Science and Department of Chemistry, Temple University, Philadelphia, Pennsylvania 19122, United States

<sup>⊥</sup>Department of Pharmaceutical Chemistry, Tanta University, Tanta 31527, Egypt

<sup>||</sup>Laboratorio de Investigación en Productos Naturales, Facultad de Química y Farmacia, University of El Salvador, San Salvador, El Salvador

<sup>#</sup>N. D. Chaurasiya and V. Gogineni contributed equally to this study.

## Table of Content

---

|                                                                      | Page |
|----------------------------------------------------------------------|------|
| Figure S1. <sup>1</sup> H NMR spectrum of compound 1.                | 3    |
| Figure S2. <sup>13</sup> C NMR spectrum of compound 1.               | 4    |
| Figure S3. <sup>13</sup> C NMR and DEPT135 experiment of compound 1. | 5    |
| Figure S4. HMBC experiment of compound 1.                            | 6    |
| Figure S5. NOESY experiment of compound 1.                           | 7    |
| Figure S6. HRESIMS (+) for compound 1.                               | 8    |
| Table S1. Docking score for the related flavonoids                   | 9    |

---

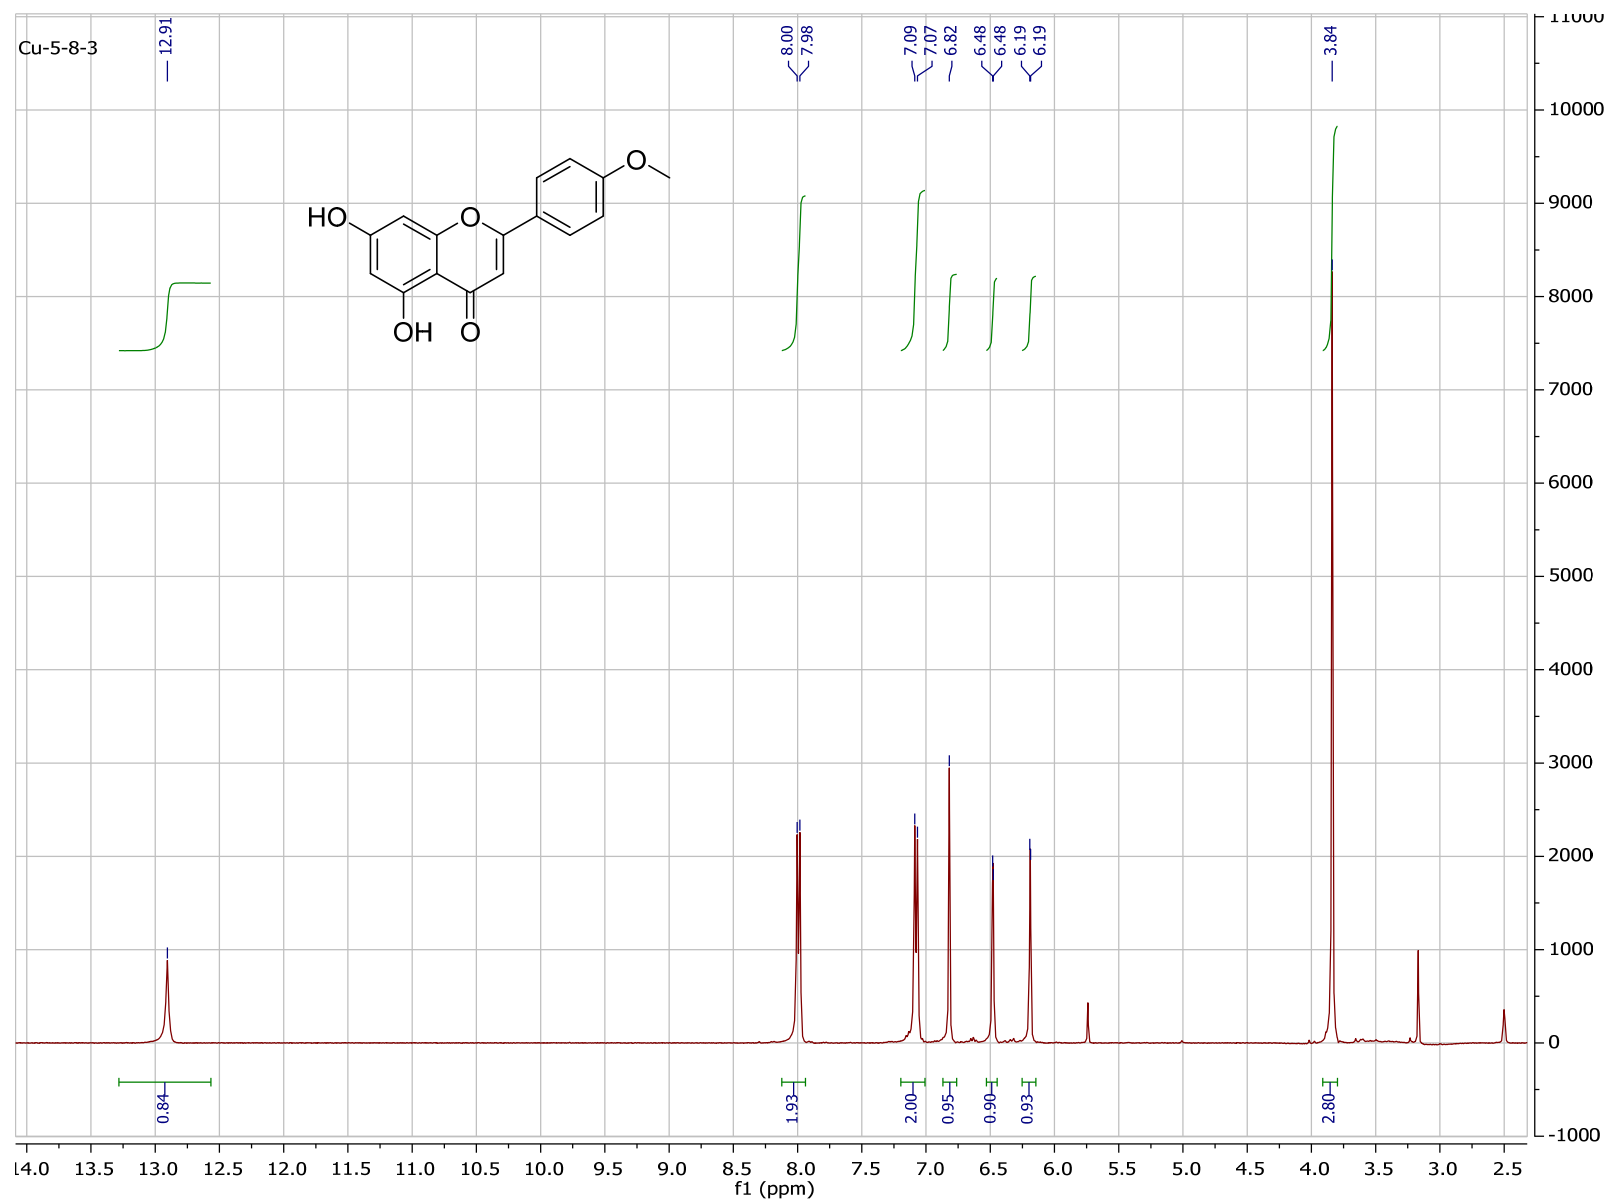

Figure S1.  $^1\text{H}$  NMR spectrum of compound 1.

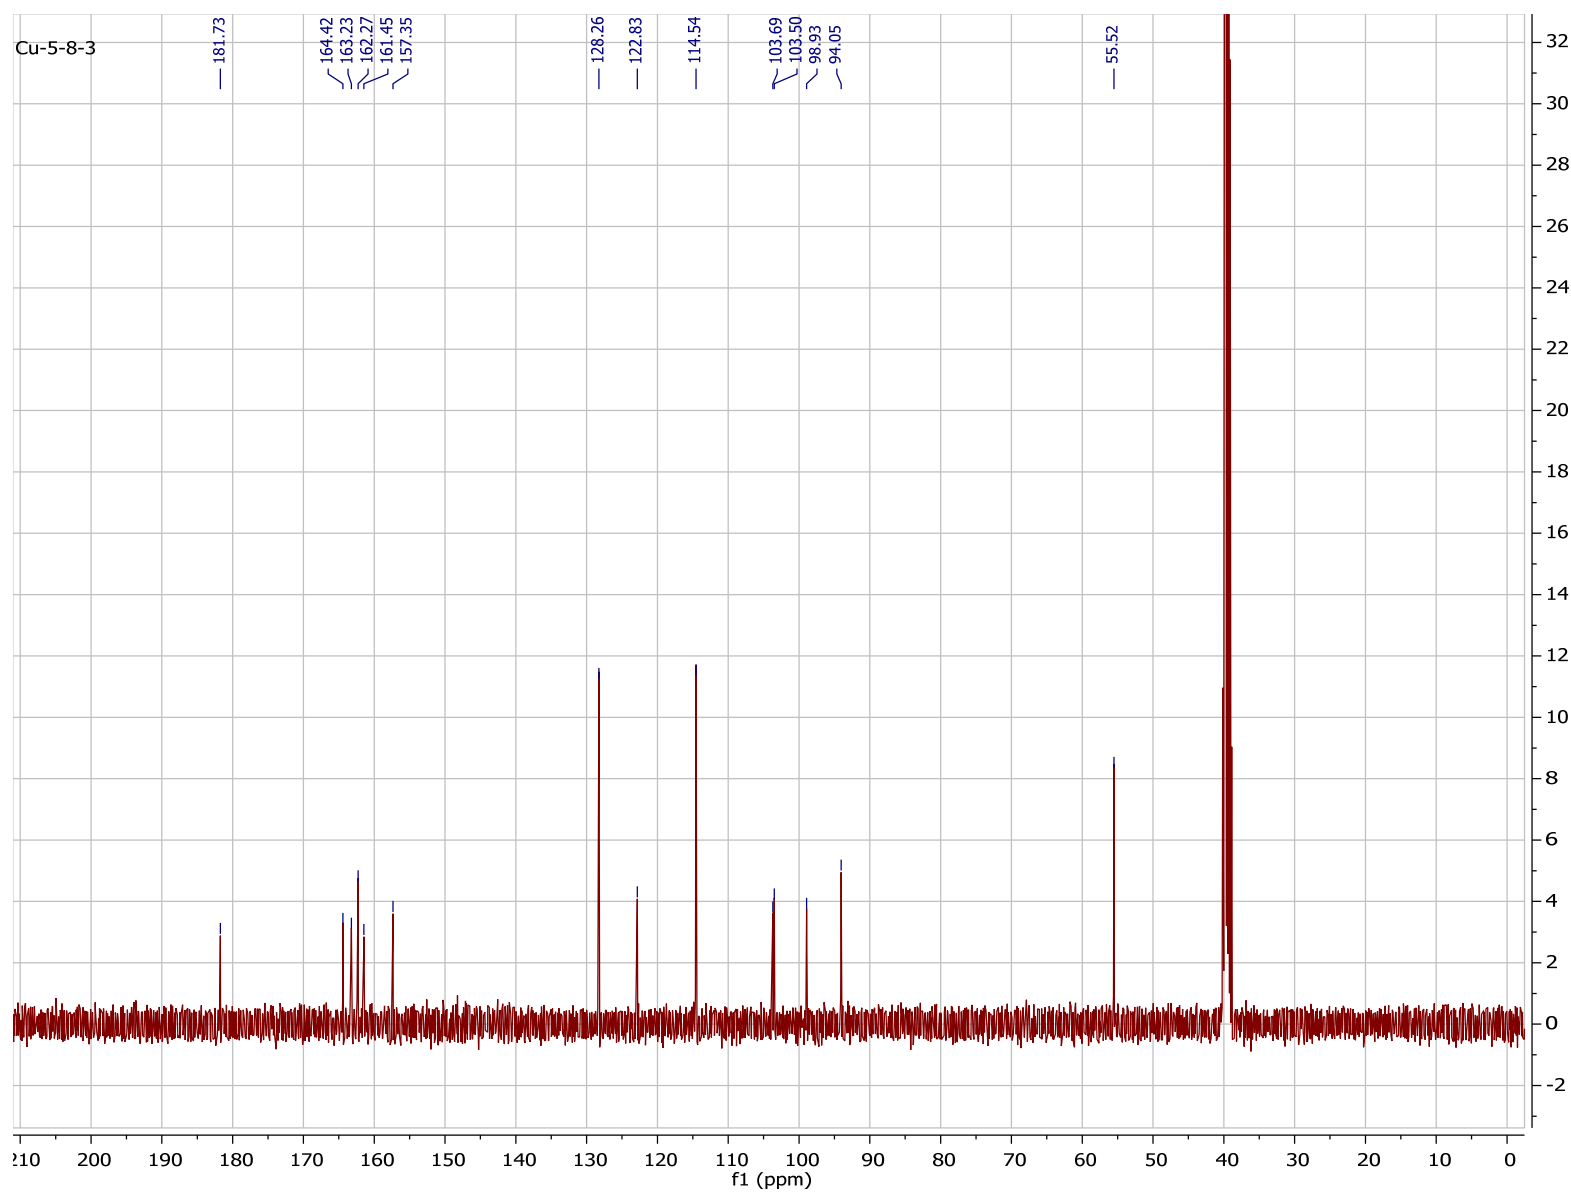

Figure S2. .  $^{13}\text{C}$  NMR spectrum of compound 1.

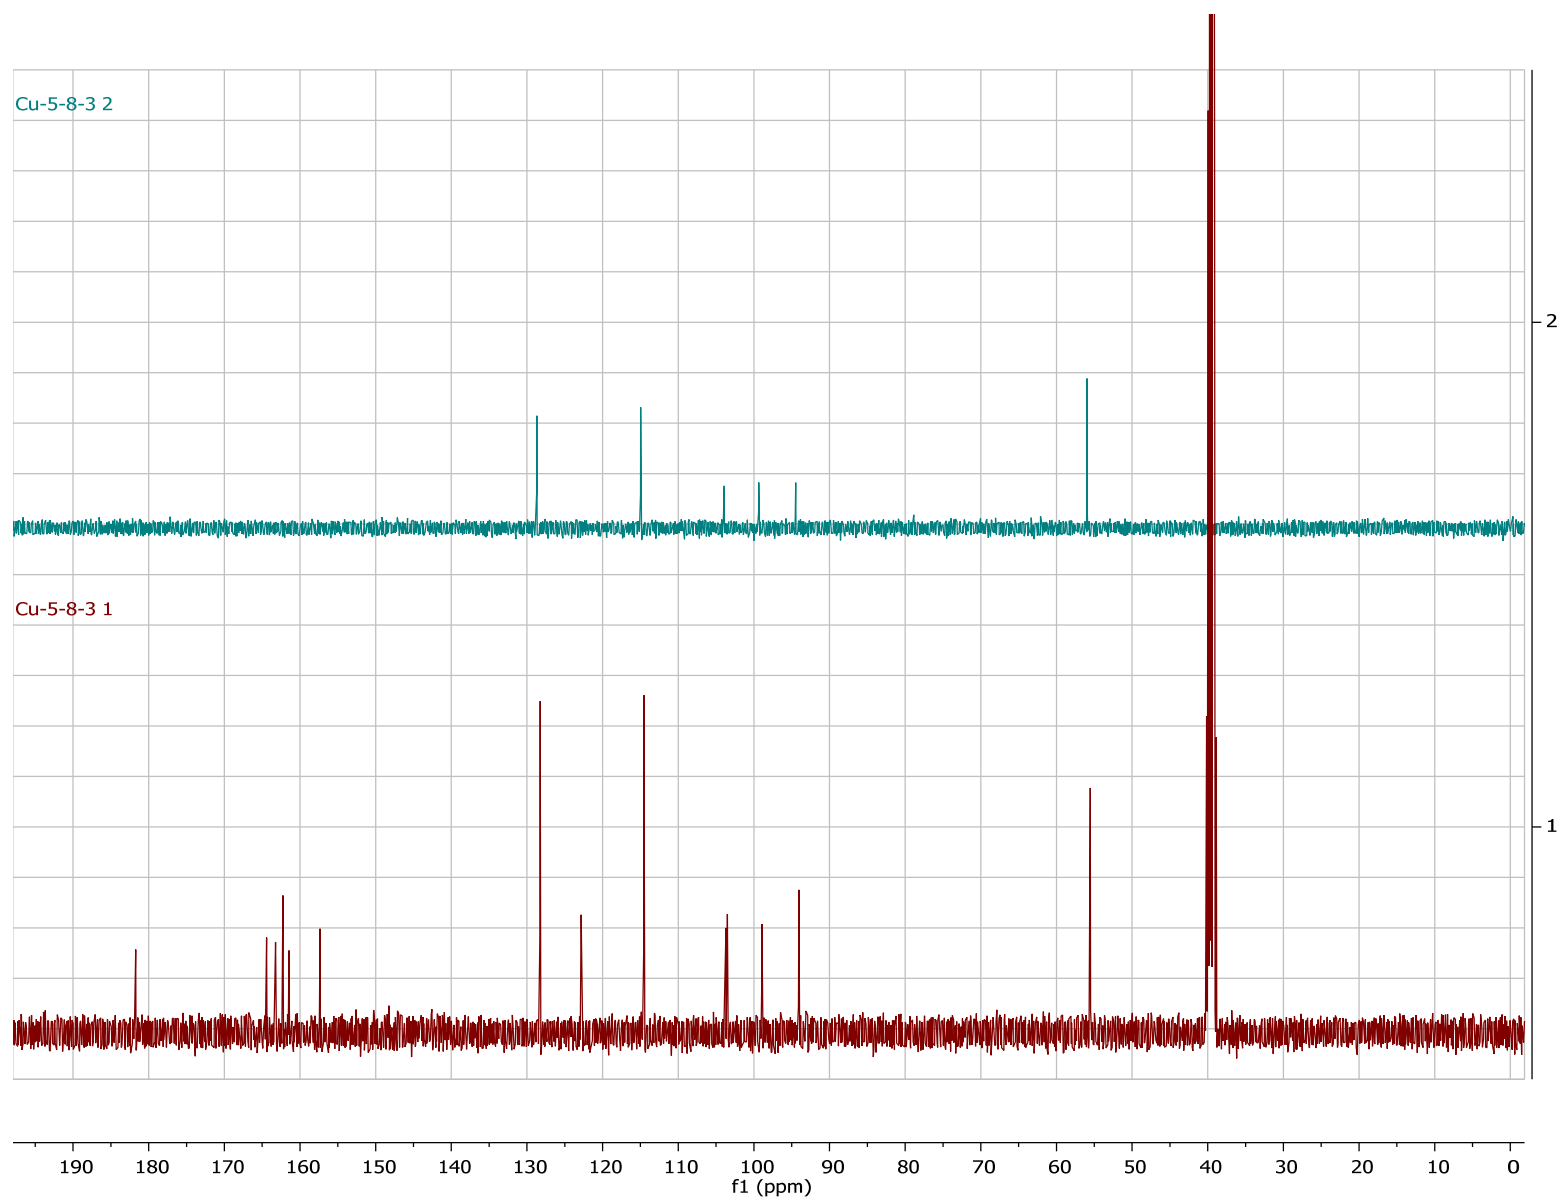

Figure S3.  $^{13}\text{C}$  NMR and DEPT135 experiment of compound 1.

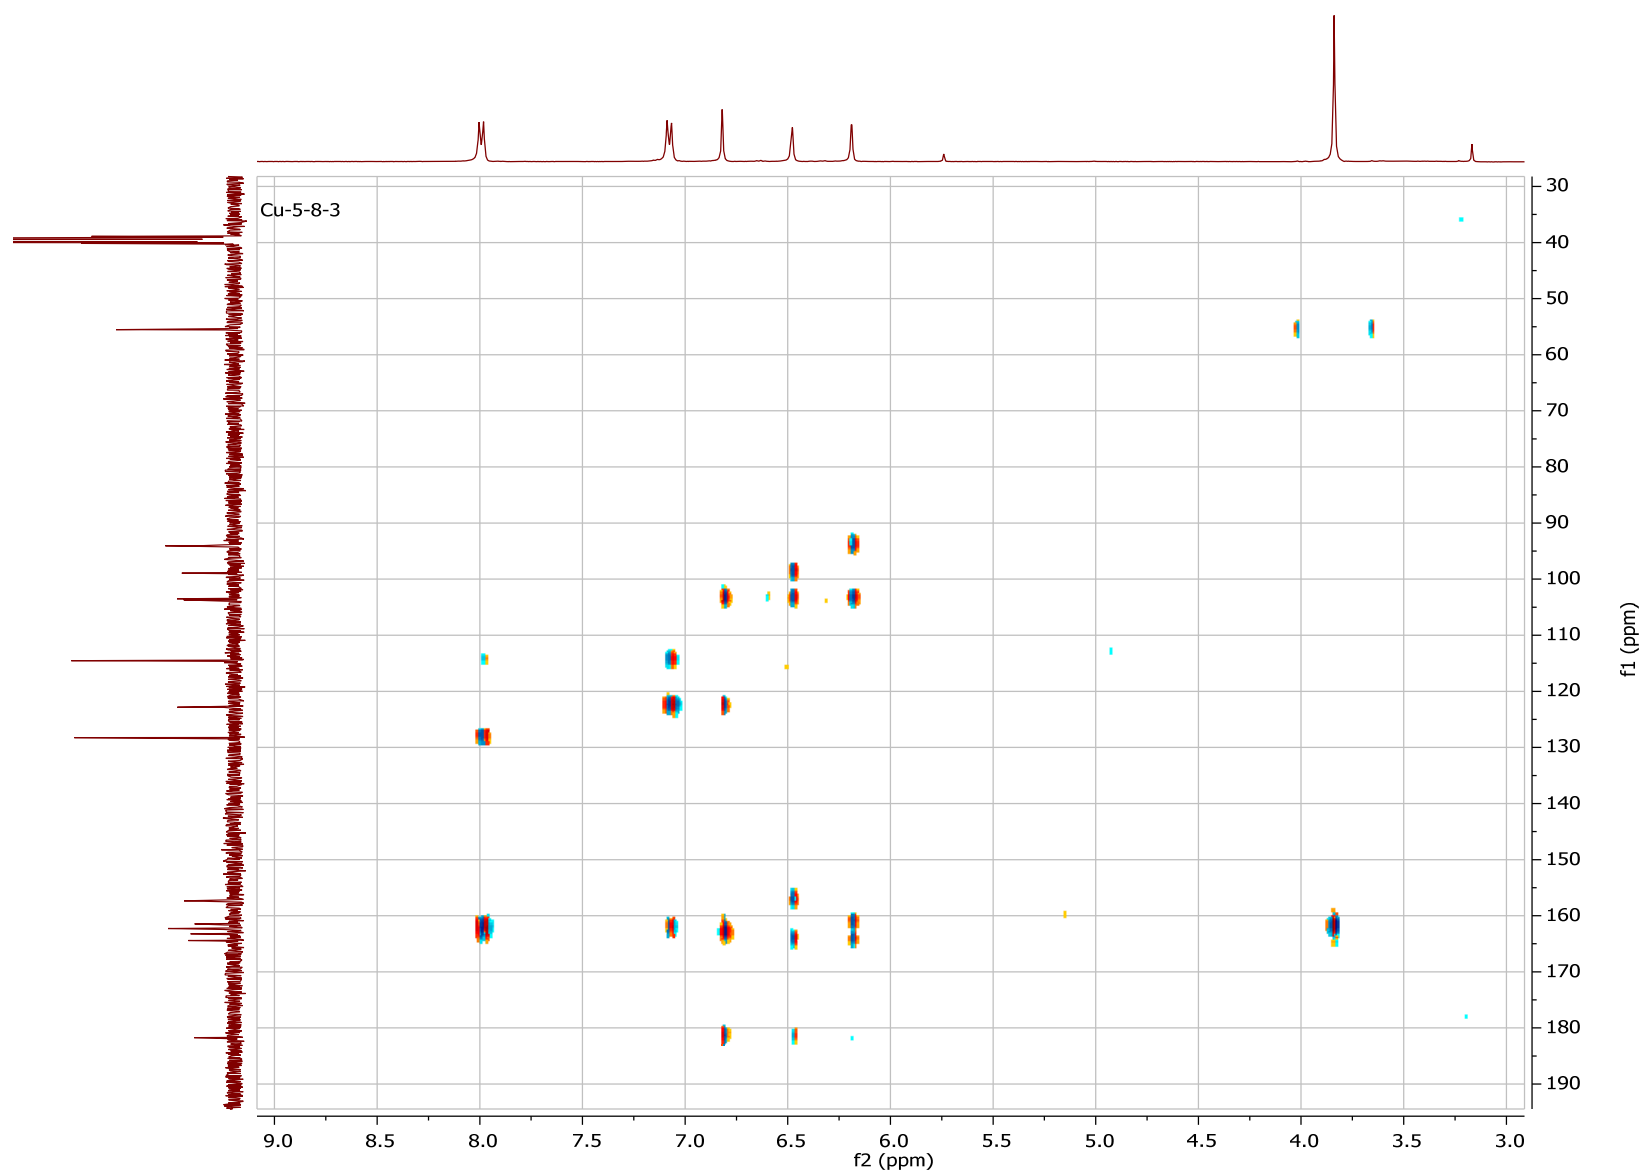

**Figure S4. HMBC experiment of compound 1.**

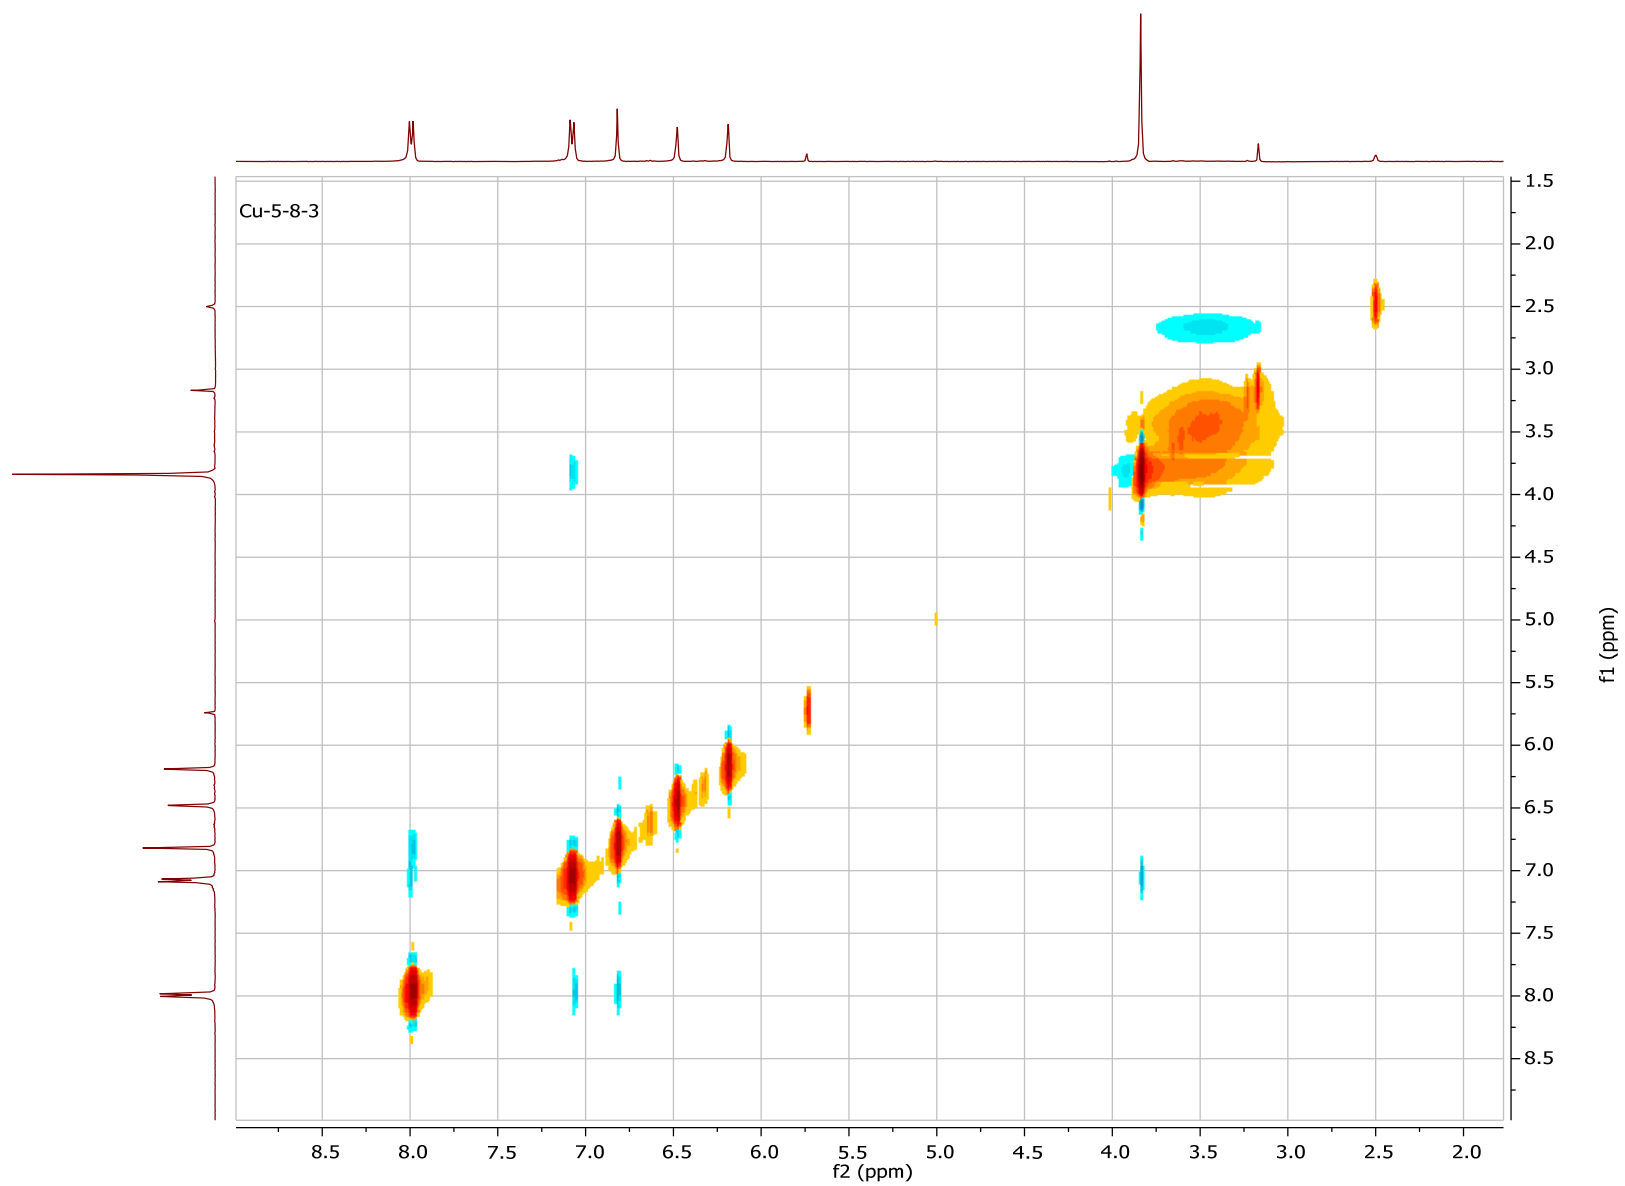

**Figure S5. NOESY experiment of compound 1.**

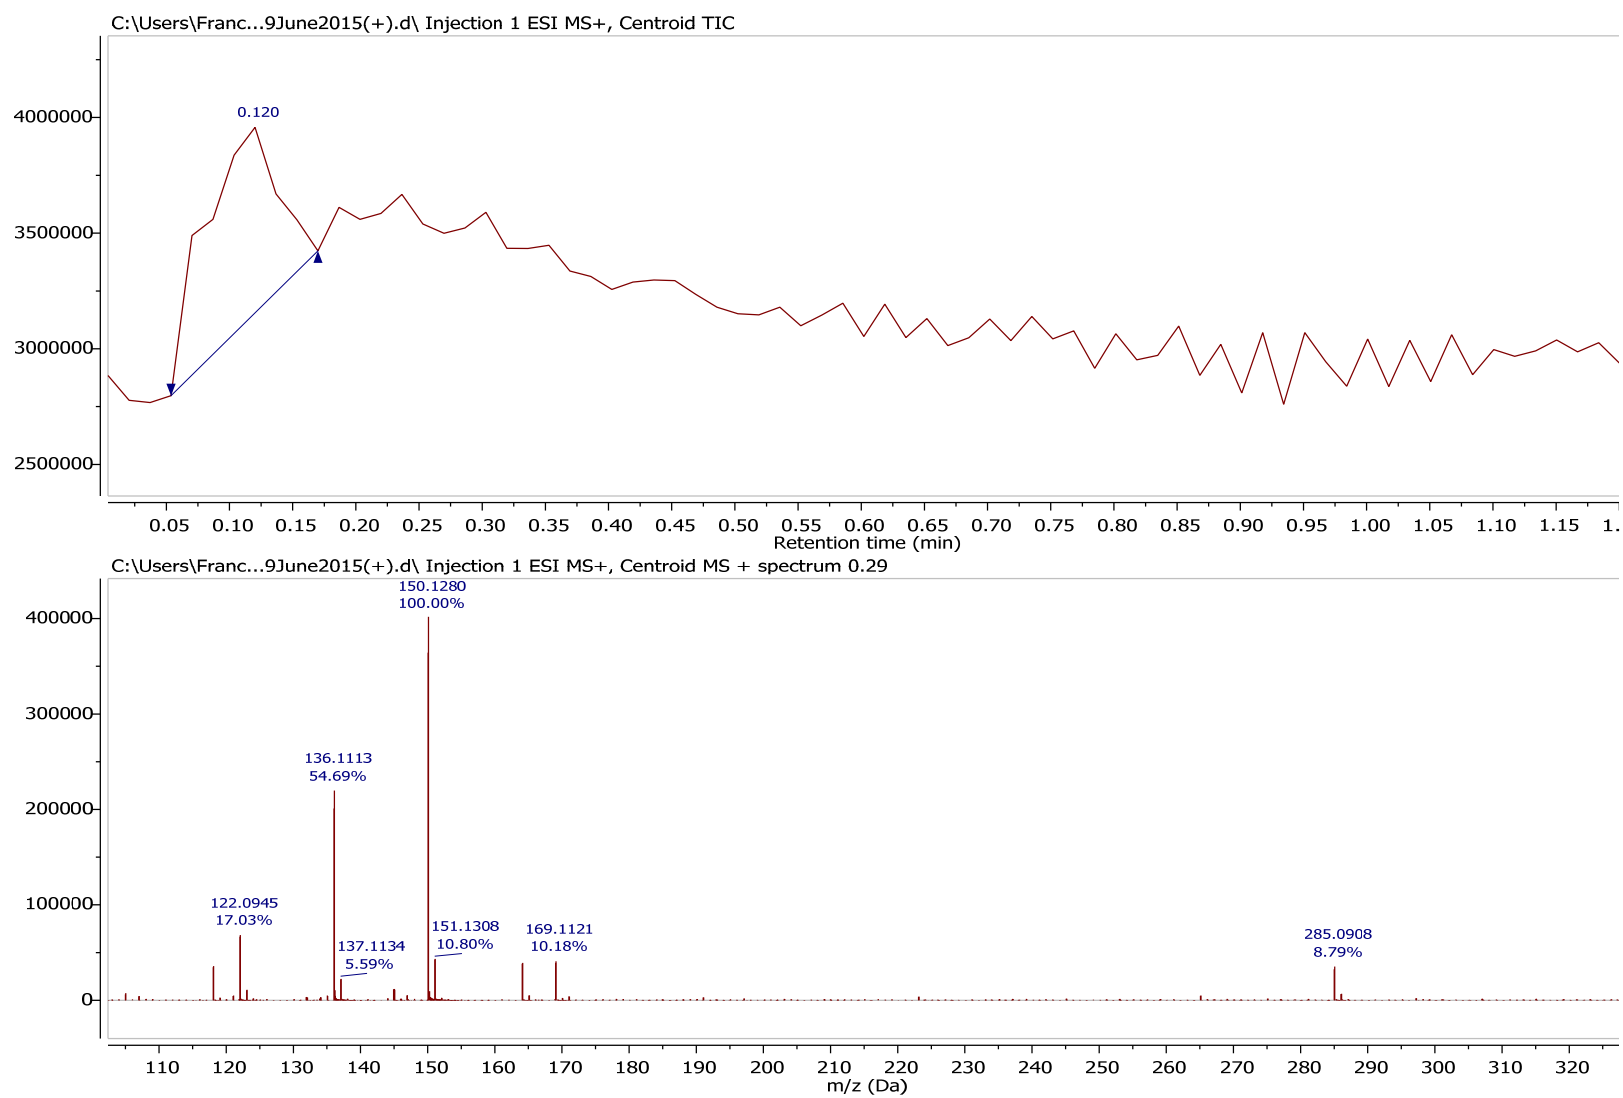

**Figure S6. HRESIMS (+) for compound 1.**



**Table S1.** Docking score for the related flavonoids

| <b>Compounds</b> | <b>Monoamine Oxidase-A</b><br>(Kcal/mol) | <b>Monoamine Oxidase-B</b><br>(Kcal/mol) |
|------------------|------------------------------------------|------------------------------------------|
| Acacetin         | -6.2                                     | -8.1                                     |
| Apigenin         | -6.0                                     | -5.6                                     |
| Quercetin        | -5.7                                     | -5.1                                     |
| Galangin         | -6.2                                     | -5.4                                     |
| Naringenin       | -4.5                                     | -4.9                                     |
